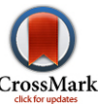

# Single Muscle Fiber Gene Expression with Run Taper

Kevin Murach, Ulrika Raue, Brittany Wilkerson, Kiril Minchev, Bozena Jemiolo, James Bagley, Nicholas Luden, Scott Trappe\*

Human Performance Laboratory, Ball State University, Muncie, Indiana, United States of America

## Abstract

This study evaluated gene expression changes in gastrocnemius slow-twitch myosin heavy chain I (MHC I) and fast-twitch (MHC IIa) muscle fibers of collegiate cross-country runners ( $n=6$ ,  $20\pm 1$  y,  $VO_{2max}=70\pm 1$  ml $\cdot$ kg $^{-1}\cdot$ min $^{-1}$ ) during two distinct training phases. In a controlled environment, runners performed identical 8 kilometer runs ( $30:18\pm 0:30$  min:s,  $89\pm 1\%$  HR $_{max}$ ) while in heavy training ( $\sim 72$  km/wk) and following a 3 wk taper. Training volume during the taper leading into peak competition was reduced  $\sim 50\%$  which resulted in improved race times and greater cross-section and improved function of MHC IIa fibers. Single muscle fibers were isolated from pre and 4 hour post run biopsies in heavily trained and tapered states to examine the dynamic acute exercise response of the growth-related genes Fibroblast growth factor-inducible 14 (*FN14*), Myostatin (*MSTN*), Heat shock protein 72 (*HSP72*), Muscle ring-finger protein-1 (*MURF1*), Myogenic factor 6 (*MRF4*), and Insulin-like growth factor 1 (*IGF1*) via qPCR. *FN14* increased 4.3-fold in MHC IIa fibers with exercise in the tapered state ( $P<0.05$ ). *MSTN* was suppressed with exercise in both fiber types and training states ( $P<0.05$ ) while *MURF1* and *HSP72* responded to running in MHC IIa and I fibers, respectively, regardless of training state ( $P<0.05$ ). Robust induction of *FN14* (previously shown to strongly correlate with hypertrophy) and greater overall transcriptional flexibility with exercise in the tapered state provides an initial molecular basis for fast-twitch muscle fiber performance gains previously observed after taper in competitive endurance athletes.

**Citation:** Murach K, Raue U, Wilkerson B, Minchev K, Jemiolo B, et al. (2014) Single Muscle Fiber Gene Expression with Run Taper. PLoS ONE 9(9): e108547. doi:10.1371/journal.pone.0108547

**Editor:** Stephen E. Alway, West Virginia University School of Medicine, United States of America

**Received:** February 20, 2014; **Accepted:** August 29, 2014; **Published:** September 30, 2014

**Copyright:** © 2014 Murach et al. This is an open-access article distributed under the terms of the Creative Commons Attribution License, which permits unrestricted use, distribution, and reproduction in any medium, provided the original author and source are credited.

**Funding:** Funding provided by National Institutes of Health (AG 038576). The funders had no role in study design, data collection and analysis, decision to publish, or preparation of the manuscript.

**Competing Interests:** The authors have declared that no competing interests exist.

\* Email: strappe@bsu.edu

## Introduction

Athletes routinely reduce training volume prior to a major competition to help facilitate peak performance. A 3–4 week reduced training phase, known as taper, typically results in a 2–4% improvement in race performance [1–3]. In the last 30 years, taper research has identified increased power output at the whole muscle and single muscle fiber level as an important physiological basis for improved performance [1,2,4]. More specifically, tapering has been repeatedly shown to target fast-twitch muscle fibers by increasing their size [1–3] and power [1,2] with improvements in contractile performance largely accounted for by hypertrophy. However, little is known about molecular alterations that are contributing to performance gains in fast-twitch muscle fibers with tapering.

Recent methodological advances in our laboratory have established the ability to examine gene expression at the single muscle fiber level [5–7]. We sought to apply this novel approach with tapering to better understand potential molecular adaptations in fast-twitch muscle fibers. We were guided into these single muscle fiber gene studies by previous work in cross-country runners (for whom muscle biopsy samples were still available) that had an altered transcriptional response in mixed-muscle homogenate samples after identical 8 km running bouts in the heavily trained versus tapered state [2]. This alteration was intriguing since previous research has shown a blunted transcriptional response to exercise in well-conditioned skeletal muscle [6,8].

Thus, it appears that skeletal muscle of highly trained athletes may be more sensitive at the molecular level to various training phases than previously thought. Further support for conducting these single fiber gene studies was that the runners' MHC IIa fibers hypertrophied (+15%) and increased power output (+9%) with taper [2]. The combination of single muscle fiber gene measurements at strategically timed muscle biopsies after a heavily trained and tapered state 8 km run provided a unique opportunity to gauge the transcriptional flexibility of the MHC IIa fibers during these two training periods.

For the single muscle fiber gene experiments, we selected six genes that have been implicated in muscle size regulation and remodeling and included *FN14*, *MSTN*, *HSP72*, *MURF1*, *MRF4*, and *IGF1*. In developed human skeletal muscle, Fibroblast growth factor-inducible 14 (*FN14/TNFRSF12A*) was recently shown to strongly correlate with fast-twitch specific growth in response to exercise [6,9], the cytokines Myostatin (*MSTN/GDF8*) and Insulin-like growth factor 1 (*IGF1*) are components of major growth pathways [10], Myogenic factor 6 (*MRF4/MYF6*) is associated with exercise-induced remodeling [7], Muscle ring-finger protein-1 (*MURF1/TRIM63*) is a marker of ubiquitin-proteasome mediated myofibrillar breakdown [11], and Heat shock protein 72 (*HSP72/HSPA1A*) combats protein degradation [12]. We hypothesized that advantageous post exercise regulation of *HSP72*, *MURF1*, and *MRF4* previously observed in mixed-muscle with taper [2] would be more pronounced in MHC IIa fibers and that favorable *FN14*, *MSTN*,

and *IGF1* expression would be targeted to the MHC IIa muscle fibers.

**Materials and Methods**

**Subjects**

Seven male runners from Taylor University’s (Upland, Indiana) cross-country team volunteered to participate in a previous study [2]. Of these seven subjects, six were used for this investigation (age [y]  $20 \pm 1$ , height [cm]  $178 \pm 5$ , weight [kg]  $66.1 \pm 5.1$ ) (Table 1) as insufficient tissue at one time point for one subject negated molecular analysis. Details of the general study design and taper program are outlined in our previous investigation [2] and briefly profiled here (Figures 1 and 2). Subjects were competitive runners with 8 km lifetime best average performances of  $26:32 \pm 0:32$  (min:s). Prior to the investigation, subjects competitively participated in running for  $\sim 7$  years (range: 4.5–10.0 y). Subjects were provided with written and oral information about experimental procedures and potential risks prior to providing written consent.

**Ethics Statement**

Support was granted by the coaching staff and all procedures were approved by the Ball State University and Taylor University Institutional Review Boards.

**Experimental Design**

A schematic of the study design is presented in Figure 3. Identical laboratory procedures were performed in the heavily trained (T1 and T2) and tapered (T3 and T4) conditions. Resting (heavily trained - T1, tapered - T3) and 4 h post exercise (heavily trained - T2, tapered - T4) gastrocnemius muscle biopsies were collected around an 8 km standardized indoor track run. MHC I and IIa fibers were individually isolated and pooled in order to conduct targeted fiber type specific gene expression analysis via reverse transcription quantitative real-time polymerase chain reaction (qPCR). The effect of taper was examined by conducting

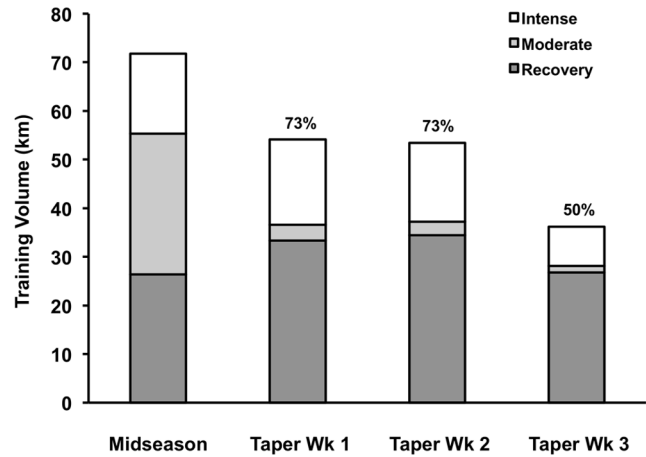

**Figure 2. Summary of training volume and intensity during heavy training (11 wks) and each week of taper (3 wks), reproduced from Luden et al. [2] with permission from the American Physiological Society.**  
doi:10.1371/journal.pone.0108547.g002

exercise response comparisons (T1:T2 and T3:T4) in both fiber types. Subjects were treadmill tested for aerobic capacity before and after the taper period.

**Training**

Taylor University coaching staff prescribed the training performed throughout the 11 wk season (8 wks of midseason heavy training +3 wks of reduced-volume taper) based upon recommendations from our laboratory team. Training load was quantified using heart rate monitor data (Polar, Lake Success, NY) and self-reported running logs while mid-season training load (8 wks) was aggregated to represent one mean for heavy training. Average mid-season weekly running volume (6 d/wk) was approximately 72 km. During the 3 wk taper, weekly running volume in the moderate intensity range was progressively reduced

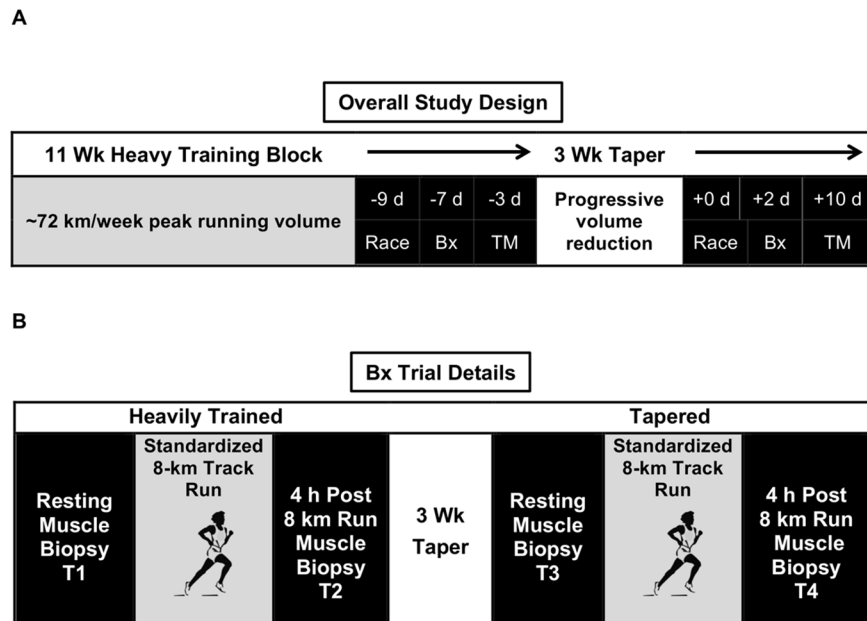

**Figure 1. Overall study design (A), and Biopsy trial details (B).** Bx=lateral gastrocnemius muscle biopsy, TM=Treadmill  $VO_{2max}$  testing.  
doi:10.1371/journal.pone.0108547.g001

**Table 1.** Subject characteristics and physiological data (n = 6).

|                                                                           | Heavily Trained | Tapered    | % Δ  |
|---------------------------------------------------------------------------|-----------------|------------|------|
| MHC IIa CSA ( $\mu\text{m}^2$ )                                           | 5812±622        | 6631±758   | +14% |
| MHC IIa Power ( $\mu\text{N}\cdot\text{FL}^{-1}\cdot\text{s}^{-1}$ )      | 58.7±6.4        | 63.5±7.3   | +9%  |
| VO <sub>2max</sub> ( $\text{ml}\cdot\text{kg}^{-1}\cdot\text{min}^{-1}$ ) | 70.0±1.1        | 69.1±1.1   | ↔    |
| X-Country Race Performance (min:s)                                        | 27:42±0:25      | 27:00±0:30 | -3%  |

Data derived from Luden et al. [2] less one subject.  
doi:10.1371/journal.pone.0108547.t001

to 50% of mid-season training while high intensity training volume was maintained (Figure 2).

### Standardized 8 km Indoor Track Run

Subjects were instructed to run 8 km on a 200 m indoor track between 15.2 and 16.0 km/h (~45–48 s/lap) depending on talent level (30:18±0:30 min:s, 89±1% HR<sub>max</sub>). This pace was chosen because it corresponded to a training velocity commonly performed by this group. Lap times were verbalized throughout the run to ensure even pacing and each lap split was recorded manually. Subjects performed identical runs in the heavily trained and tapered state and were monitored by the investigative team.

### Muscle Biopsy

Four muscle biopsies (T1, T2, T3, T4) were obtained from the lateral head of the gastrocnemius. The gastrocnemius was chosen based on its documented use during running [13] and the large amount of gastrocnemius research conducted in runners over the past 40 years. Subjects reported to Taylor University having refrained from physical activity for two days (~48 h). After 30 min of supine rest, a resting muscle biopsy was obtained (T1, T3) followed by a standardized 8 km run on a 200 m indoor track. Subjects then underwent 4 h of supine rest upon which a second biopsy was obtained from the opposite leg (T2, T4). The rationale for the 4 h post exercise biopsy time point was based on previous post exercise mRNA time course investigations from our laboratory [7,14]. From each biopsy, a muscle sample weighing ~15 mg was placed in 0.5 ml of RNAlater (Ambion, Austin, TX), stored at 4°C overnight, and subsequently stored at -20°C until fiber separation and RNA extraction.

### Muscle Fiber Separation and MHC Identification

See Figure 3 for a schematic representation of the method used for fiber type-specific isolation and fiber pooling for qPCR. Individual muscle fibers were isolated in RNAlater using fine tweezers under a light microscope at room temperature as previously described [5,11,15,16]. An average of 129 fibers were isolated from each of the 24 samples (6 subjects×4 biopsies) for a total of 3,096 fibers. Approximately one quarter of each fiber was clipped and placed into 40  $\mu\text{l}$  sodium dodecyl sulfate (SDS) buffer (1% SDS, 6 mg/ml ethylenediaminetetraacetic acid [EDTA], 0.06 M Tris [pH 6.8], 2 mg/ml bromophenol blue, 15% glycerol, and 5% b-mercaptoethanol) for SDS-PAGE (sodium dodecyl sulfate polyacrylamide gel electrophoresis) MHC identification as previously described by our laboratory [5,11,15,16]. The remaining fiber segment was placed into an individual well of a number-labeled 96-well plate with 75  $\mu\text{l}$  RNAlater and stored at -20°C until MHC type was confirmed and before fiber type-specific pooling. Overall MHC fiber type distribution of each subject's lateral gastrocnemius was determined using all fibers extracted from each individual.

### Fiber Pooling and RNA Extraction

Following MHC isoform identification, the corresponding MHC I and IIa fiber segments were located in the 96-well plate. Muscle fibers of each type (MHC I and IIa) at each time point (T1, T2, T3, T4) were extracted from their individual wells containing RNAlater and combined in a tube containing 500  $\mu\text{l}$  TRI Reagent (Molecular Research Center, Cincinnati OH) used for RNA extraction. RNA extraction was performed according to the manufacturers protocol (MRC) and total RNA concentration (4.07±0.15 ng/ $\mu\text{l}$ ) was determined using the Quant-iT RNA assay kit (Invitrogen, Carlsbad, CA) in conjunction with the Qubit fluorometer (Invitrogen). Forty-eight samples (24 samples×2 fiber types) were ultimately generated containing 36±6 (range 23–54) fibers, an amount sufficient to yield an RNA concentration of > 1.5 ng/ $\mu\text{l}$  [6,7].

### Reverse Transcription and qPCR

Oligo (dT) primed first-strand cDNA was synthesized (16.5 ng of total RNA) using SuperScript II RT (Invitrogen) and quantification of mRNA levels (in duplicate) was performed in a 72-well Rotor-Gene 3000 Centrifugal Real-Time Cycler (Corbett Research, Mortlake, NSW, Australia). Ribosomal protein, large, P0 (*RPLP0*) was used as a reference gene as we have previously described [17]. All primers used in this study were mRNA-specific (on different exons and crossing over an intron) and designed for qPCR (Vector NTI Advance 9 software, Invitrogen) using SYBR Green chemistry. The primer sequences for *FN14* were: Forward -ACTTCTGCCTGGGCTGCGCT and Reverse -TCTCCTGCGGCATCGTCTCC, Genbank number: NM\_016639.2. Primer sequences and characteristics for *MSTN*, *HSP72*, *MURF1*, *MRF4*, and *IGF1* as well as qPCR parameters have been reported previously from our laboratory [2,5,7,14,18]. For each qPCR run, a melting curve analysis was generated to validate the presence of only one product and a serial dilution curve (cDNA made of 500 ng total RNA from human skeletal muscle; Ambion, Austin, TX) was generated to evaluate reaction efficiencies. The amplification calculated by the Rotor-Gene software was specific and highly efficient (efficiency = 1.03±0.02; R<sup>2</sup> = 0.99±0.00; slope = 3.24±0.04). The gene expression response to exercise (8 km run) was examined in the heavily trained and tapered state using the 2<sup>-ΔΔC<sub>T</sub></sup> (fold change) quantification method [14,19,20].

### Statistics

Data were checked for normality and sphericity and original or log transformed data were used for statistical analyses. Within each fiber type, the gene expression response to exercise in the heavily trained and tapered state was evaluated using a repeated measures two-way ANOVA with factors of time (T1–T4) and training state (heavily trained and tapered). Due to the minimal number of hybrids (<8%) and no IIX fibers in these highly trained runners,

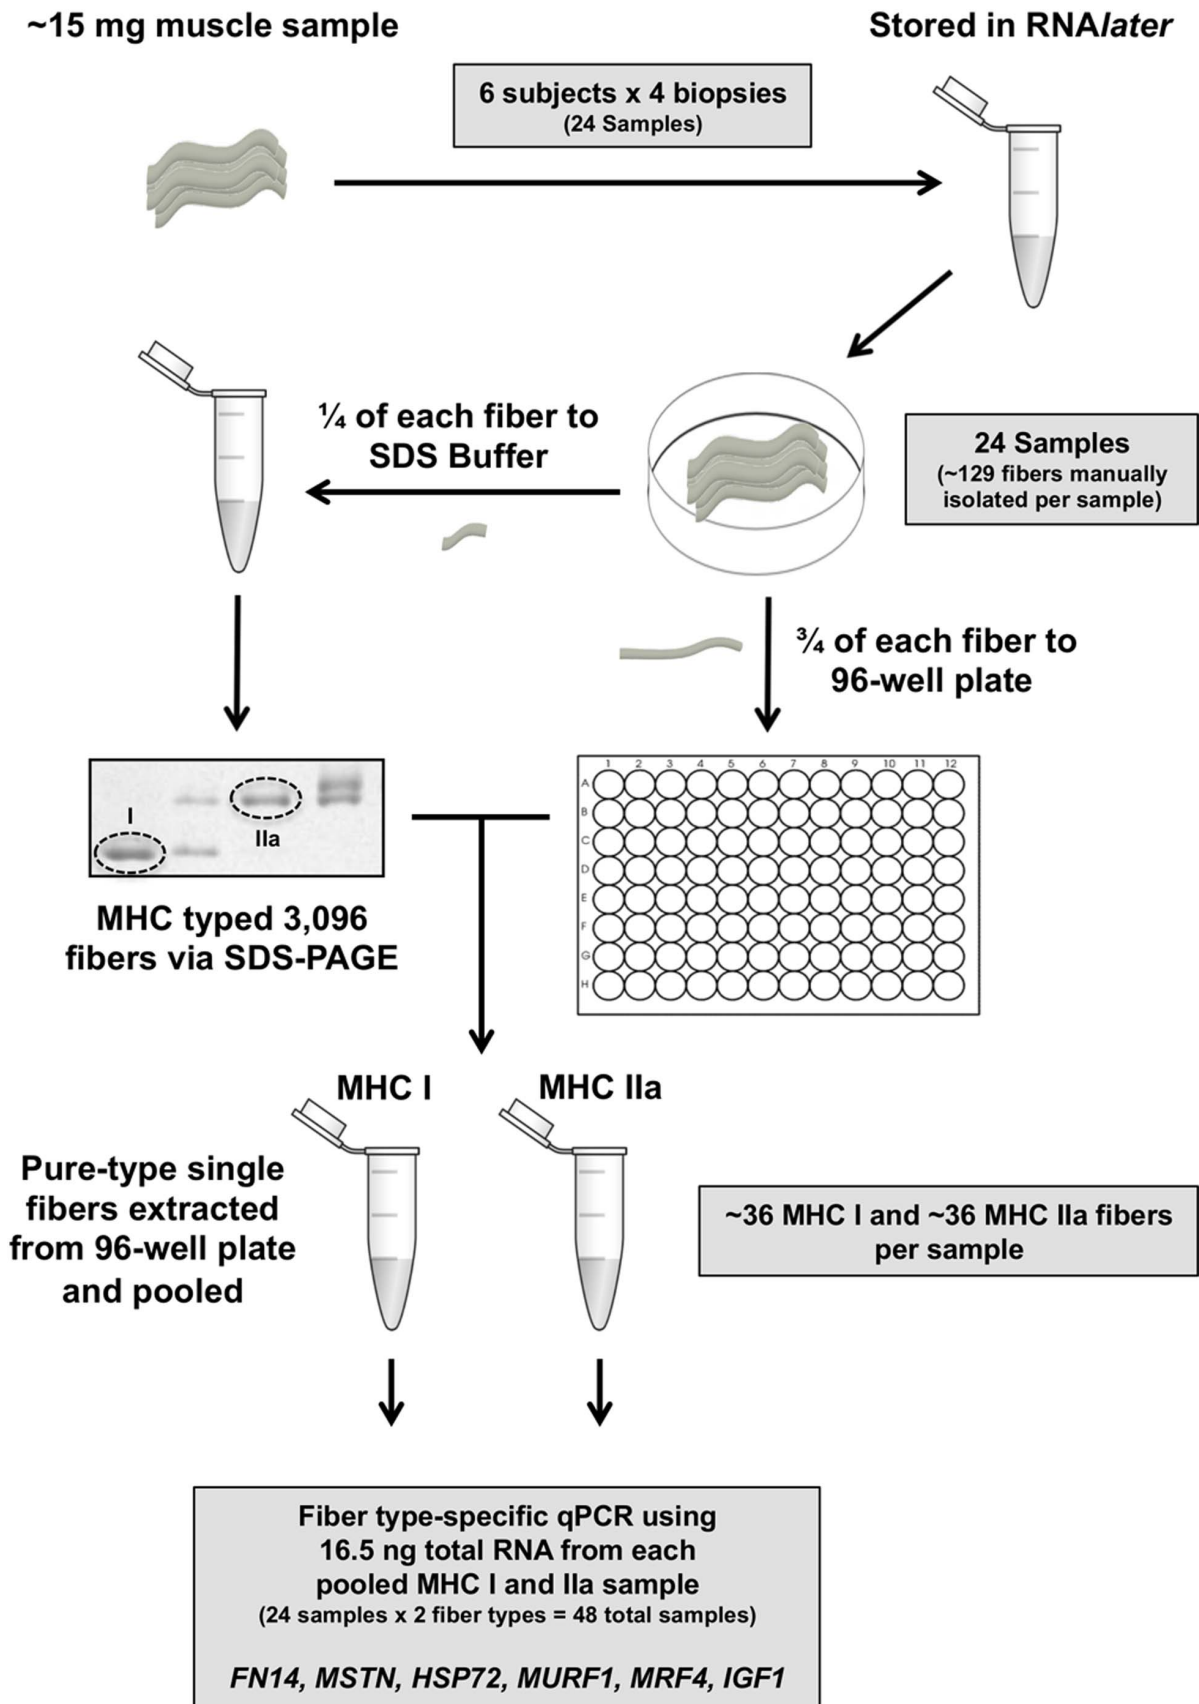

**Figure 3. Schematic of method used to conduct fiber type-specific isolation of single muscle fibers for qPCR analysis.**  
 doi:10.1371/journal.pone.0108547.g003

gene expression analysis was limited to MHC I and MHC IIa fibers. All statistics were conducted in SPSS 17.0 for Windows, all data are presented as means  $\pm$  SE, and significance was set at  $P < 0.05$ .

## Results

### Exercise-Induced (T1:T2 and T3:T4) Gene Expression in MHC IIa fibers

In the tapered state (T3:T4), *FN14* mRNA increased 4.3-fold (time and interaction effect,  $P < 0.05$ , Figure 4) 4 h following the 8 km run. *MSTN* decreased 1.6-fold in the heavily trained state and 2.0-fold in the tapered state (time effect,  $P < 0.05$ , Figure 5A). *MURF1* increased 2.7-fold in the heavily trained state and 4.0-fold in the tapered state (time effect,  $P < 0.05$ , Figure 6). No changes were observed with exercise for *FN14* in the heavily trained state or *HSP72*, *MRF4*, or *IGF1* in the heavily trained or tapered state (Table 2).

### Exercise-Induced (T1:T2 and T3:T4) Gene Expression in MHC I fibers

Exercise decreased *MSTN* 1.7-fold in the heavily trained state and 1.1-fold in the tapered state (time effect,  $P < 0.05$ , Figure 5B). *HSP72* increased 1.7-fold in the heavily trained state and 2.0-fold in the tapered state (time effect,  $P < 0.05$ , Figure 7). No changes occurred in *FN14*, *MURF1*, *MRF4*, or *IGF1* with exercise in the heavily trained or tapered state (Table 3).

### Lateral Gastrocnemius Fiber Type

The average fiber type distribution (percentage) of the gastrocnemius in these runners was:  $61.7 \pm 4.0\%$  MHC I,  $4.5 \pm 1.6\%$  MHC I/IIa,  $30.9 \pm 3.1\%$  MHC IIa,  $2.7 \pm 1.7\%$  MHC IIa/IIx, and  $0.2 \pm 0.1\%$  MHC I/IIa/IIx. There were no MHC IIx fibers found in any subject. Fibers expressing multiple isoforms (MHC I/IIa, MHC IIa/IIx, and MHC I/IIa/IIx) comprised 7.4% of the total fiber population.

## Discussion

The unique aspect of this investigation was the examination of MHC I and IIa gene responses in competitive collegiate runners after identical 8 km runs in the heavily trained versus tapered state. The 8 km running stimulus used in our study design reflects a typical weekly training run ( $\sim 89\%$   $HR_{max}$ ) these athletes performed throughout the competitive season. The post 4 h run time point coincides with anabolic and catabolic mRNA expression patterns following exercise [7,14] and captures elements of muscle remodeling. The main finding was that *FN14*, a gene strongly associated with fast-twitch hypertrophy [6,9], was robustly induced in MHC IIa fibers with exercise in the tapered state. Additionally, *MSTN* was suppressed with exercise in

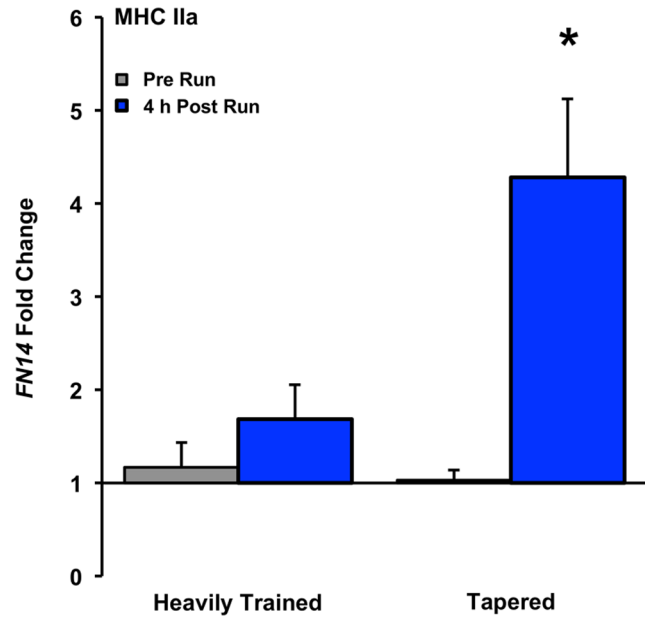

**Figure 4.** *FN14* gene expression response after an 8 km run in the heavily trained (T1:T2) and tapered (T3:T4) state in MHC IIa fibers, presented as fold change, \*Time and interaction effect,  $P < 0.05$ .

doi:10.1371/journal.pone.0108547.g004

both fiber types and training states while *MURF1* and *HSP72* responded to running in MHC IIa and I fibers, respectively, regardless of training state. Contrary to the notion that exercise gene response [6,8,21,22] and adaptive potential [23] are attenuated as training status improves, these data indicate transcriptional flexibility in MHC I and IIa fibers of highly trained runners after an effective three week taper. The marked *FN14* response in MHC IIa fibers provides an initial molecular basis to support MHC IIa hypertrophy observed with taper, a stimulus that generally produces the highest calculated fast-twitch fiber growth rate in humans.

Tapered training of  $\leq 3$  weeks in aerobically fit runners [2], swimmers [1], and cyclists [3] can be calculated to confer MHC IIa growth rates of 5.0%, 8.0%, and 14.2% per week, respectively. By comparison, MHC IIa growth with progressive resistance training in young healthy individuals occurs at a maximum rate of 3.8% by 4 weeks [24] and approaches an asymptote by 12 weeks [25] as adaptation becomes more refined (see Table S1 for comprehensive review of fast-twitch growth with exercise). Despite being highly conditioned, fast-twitch muscle fibers of trained endurance athletes can rapidly change size in response to training adjustments which measurably affects whole muscle and single

**Table 2.** Genes not responsive to exercise in MHC IIa fibers in the heavily trained or tapered state.

|              | Heavily Trained |                 | Tapered         |                 |
|--------------|-----------------|-----------------|-----------------|-----------------|
|              | T1              | T2              | T3              | T4              |
| <i>HSP72</i> | 1.07 $\pm$ 0.17 | 1.31 $\pm$ 0.32 | 1.06 $\pm$ 0.15 | 1.77 $\pm$ 0.32 |
| <i>MRF4</i>  | 1.03 $\pm$ 0.12 | 0.84 $\pm$ 0.09 | 1.15 $\pm$ 0.28 | 0.9 $\pm$ 0.11  |
| <i>IGF1</i>  | 1.09 $\pm$ 0.17 | 1.02 $\pm$ 0.21 | 1.18 $\pm$ 0.30 | 0.77 $\pm$ 0.12 |

Presented as fold change, mean  $\pm$  SE.

doi:10.1371/journal.pone.0108547.t002



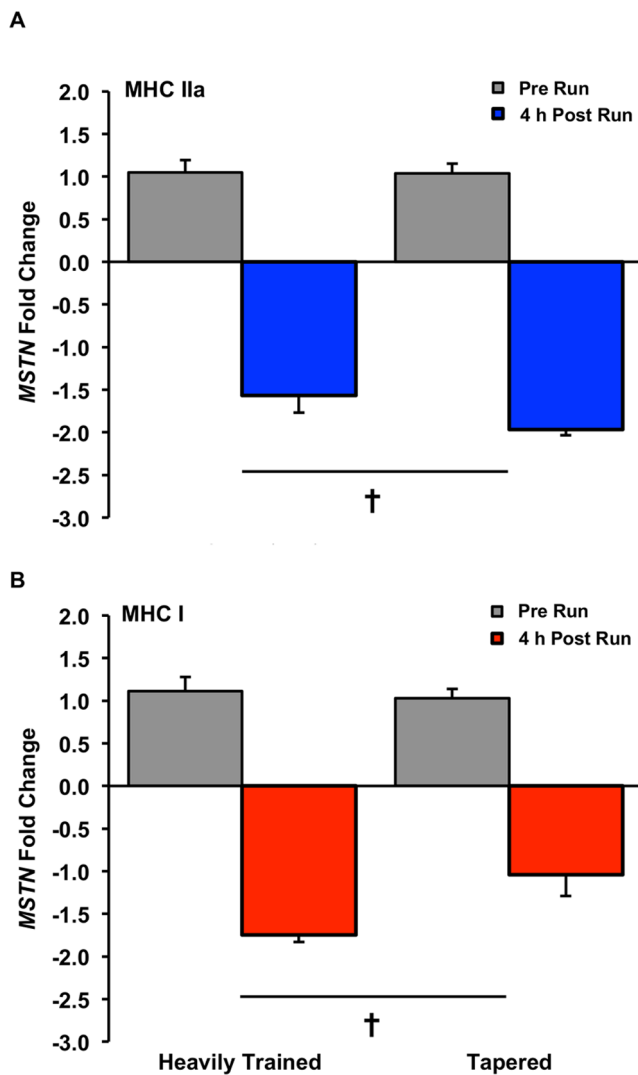

**Figure 5. *MSTN* gene expression response after an 8 km run in the heavily trained (T1:T2) and tapered (T3:T4) state in MHC I (A) and MHC IIa (B) fibers, presented as fold change, Main time effect for exercise,  $P < 0.05$ .**  
doi:10.1371/journal.pone.0108547.g005

fiber power [1,2,26,27]. However, the only transcript-level insight into mediators of fiber type-specific size regulation in humans has been in reference to resistance exercise. Acute resistance exercise elicits differential MHC I and IIa proteolytic mRNA responses [11] and activates a distinct MHC IIa transcriptome that precedes resistance training-induced increases in MHC IIa single fiber cross sectional area [6,9]. The current investigation reinforces the differential gene regulation concept, namely that *FN14* induction may augment the capacity of MHC IIa fibers to quickly grow and improve contractile function with taper.

The 4.3-fold *FN14* induction post run in tapered MHC IIa fibers aligns with our laboratory's recent finding that robust *FN14* expression after exercise is associated with isolated fast-twitch fiber size increases from resistance training [6,9]. A member of the TNF $\alpha$  superfamily, FN14 is a cell-surface receptor found on a variety of tissues including skeletal muscle [28] and appears to signal through the diverse NF- $\kappa$ B pathway [28,29]. While linked to atrophy in pathological conditions [30], FN14 also appears necessary for muscle proliferation, differentiation, and regenera-

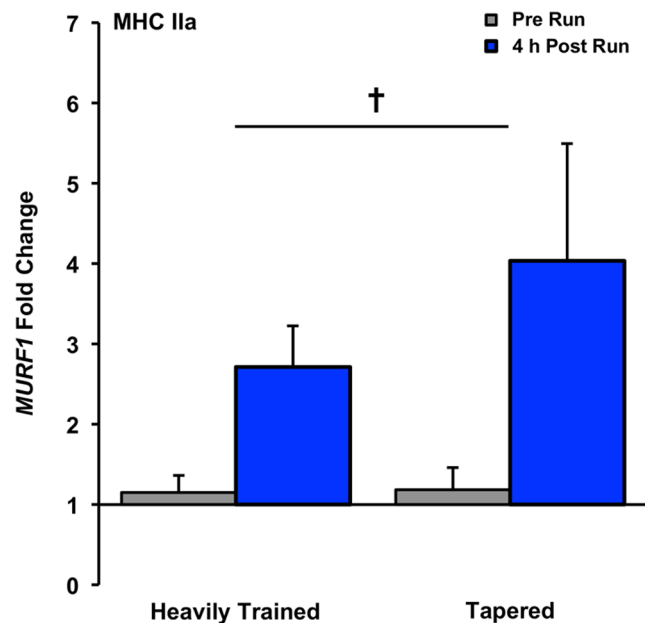

**Figure 6. *MURF1* gene expression response after an 8 km run in the heavily trained (T1:T2) and tapered (T3:T4) state in MHC IIa fibers, presented as fold change, Main time effect for exercise,  $P < 0.05$ .**  
doi:10.1371/journal.pone.0108547.g006

tion in mice and cell culture [31,32]. In this investigation, *FN14* gene induction after running in the tapered state was uniform (six of six subjects) and four responses were larger ( $\geq 4.4$ -fold) than the largest heavily trained response (2.8-fold). These occurrences highlight the magnitude of this fiber type-specific induction and further implicate *FN14* as an important component specific to the MHC IIa remodeling process in humans' response to exercise.

*MSTN* decreased post-run in both conditions and fiber types. Myostatin is a negative regulator of skeletal muscle mass that is blunted following a hypertrophic stimulus in humans [9,14,33–36]. Interestingly, Myostatin is also suppressed at the gene and protein level in humans after non-hypertrophic exercise [14,37,38]. This could signal a metabolic purpose for down-regulation [38,39] or Myostatin's supporting role in muscle remodeling and homeostasis after aerobic exercise [40]. It is worth noting, however, that the largest *MSTN* reduction observed here (2.0-fold) was in tapered MHC IIa fibers. Skeletal muscle reportedly has  $\sim 2$ –3 times the amount of Myostatin necessary to restrain growth [41] while animal [42–46] and human [47–49] fast-twitch muscle appears most sensitive to *MSTN* alterations. The 2.0-fold tapered state reduction in *MSTN* with running may have surpassed a physiologically significant threshold for Myostatin-mediated growth to occur and could have contributed to previously observed MHC IIa hypertrophy with taper [2].

*MURF1* was responsive to run exercise in the heavily trained and tapered state in MHC IIa fibers. A marker of myofibrillar protein breakdown, *MURF1* increases after acute resistance [14,20,50] and endurance [14,51] exercise and is elevated concomitant with training-induced hypertrophy [52]. Increased *MURF1* with exercise may therefore represent a normal component of the MHC IIa remodeling process in healthy human muscle. *HSP72*, *MRF4*, and *IGF1* were not altered with exercise in MHC IIa fibers in either training state. In animals, heat shock protein is less constitutively expressed in fast-twitch than slow-twitch muscle [53–55] and is less responsive to exercise in human Type IIa fibers [56]. A lack of *HSP72* response to intense training

**Table 3.** Genes not responsive to exercise in MHC I fibers in the heavily trained or tapered state.

|              | Heavily Trained |           | Tapered   |           |
|--------------|-----------------|-----------|-----------|-----------|
|              | T1              | T2        | T3        | T4        |
| <i>FN14</i>  | 2.04±1.14       | 3.18±0.92 | 1.47±0.53 | 2.25±1.13 |
| <i>MURF1</i> | 1.12±0.19       | 3.94±1.88 | 1.17±0.29 | 1.04±0.27 |
| <i>MRF4</i>  | 1.05±0.16       | 1.45±0.17 | 1.25±0.41 | 1.09±0.12 |
| <i>IGF1</i>  | 1.09±0.19       | 1.03±0.13 | 1.06±0.17 | 0.77±0.06 |

Presented as fold change, mean ± SE.  
doi:10.1371/journal.pone.0108547.t003

and taper may therefore reflect a normal pattern of heat shock protein expression in MHC IIa fibers. *MRF4* induction after taper observed previously in mixed-muscle of these runners was relatively modest (1.4 fold) [2] and was abolished at the single fiber level in both fiber types. This discrepancy could result from a combinatorial effect of all fiber types yielding significant *MRF4* expression in mixed-muscle or the potential influence of satellite cells (express *MRF4* upon activation [57,58]). Common mRNA markers of quiescent satellite cells (*NCAM1*, *CD34*, *CDH15*, *CALCR*) are present in fibers mechanically dissected using the method described here [6] which suggests satellite cell presence but the extent of satellite cell adhesion has not yet been determined. IGF1 activates the Akt/mTOR pathway and is strongly implicated in exercise-induced muscle hypertrophy [10]. However, *IGF1* transcript is shown to not change appreciably in the early recovery from aerobic [18] or resistance exercise [18,59,60] which agrees with our findings.

*HSP72* responded to exercise in MHC I fibers in both training states. This induction is consistent with greater *HSP72* protein levels in Type I vs IIa fibers following 30 minutes of acute exercise [56]. In well-conditioned aerobic athletes, the greatest increase in

basal *HSP72* protein level occurs with intensified training but overall content peaks following a reduced training period [61]. While speculative, it is conceivable that improved translational efficiency in reaction to tapering along with a slightly more pronounced *HSP72* response to exercise in tapered MHC I fibers (Figure 7) of the trained runners studied here ultimately results in greater *HSP72* protein levels after taper. This could be interpreted as a positive adjustment to the post run cellular environment that would aid in the localized stress tolerance of intense exercise performance [12] that coincides with peak level competition [1,2,4].

A properly conducted taper program in athletes prior to peak competition improves performance that appears to be mediated, in part, by increased power at the whole muscle and single muscle fiber level. The single muscle fiber performance gains with taper are targeted to MHC IIa fibers and are primarily driven by hypertrophy [1,2]. The current study extends these MHC IIa-specific muscle fiber adaptations with taper to the molecular level and reports a sizeable *FN14* induction in the tapered state that may have contributed to rapid fast-twitch remodeling. A potentially meaningful *MSTN* suppression with tapered state exercise may also help support a favorable fast-twitch growth environment. We speculate that intense aerobic training periods reduce MHC IIa plasticity of growth-related gene targets and that taper reverses this process. To what extent the taper-induced MHC IIa adaptations are due to super-compensation from intense training or recovery to levels prior to the heavy training phase has not been established. The current study illustrates how tapering can promote transcriptional flexibility not previously thought possible in well-conditioned muscle [6,8]. These basic alterations at the molecular level provide a framework for expanded studies (i.e. transcriptome, protein quantification, epigenetics, etc.) to further our understanding of MHC IIa plasticity with exercise training paradigms.

### Supporting Information

**Table S1** Summary of literature on selective fast-twitch size alterations in young healthy individuals.  
(PDF)

### Acknowledgments

We would like to thank the Taylor University cross-country team, Ted Bowers (head coach), and the coaching staff for their enthusiastic participation in this research. Thank you to Dr. David Costill for his review and comments on the manuscript. We also wish to thank Drs. Erik Hayes, Andrew Galpin, Matt Harber, and Todd Trappe for their assistance with data collection during the taper project and Dr. Holmes Finch for his invaluable insight concerning statistics.

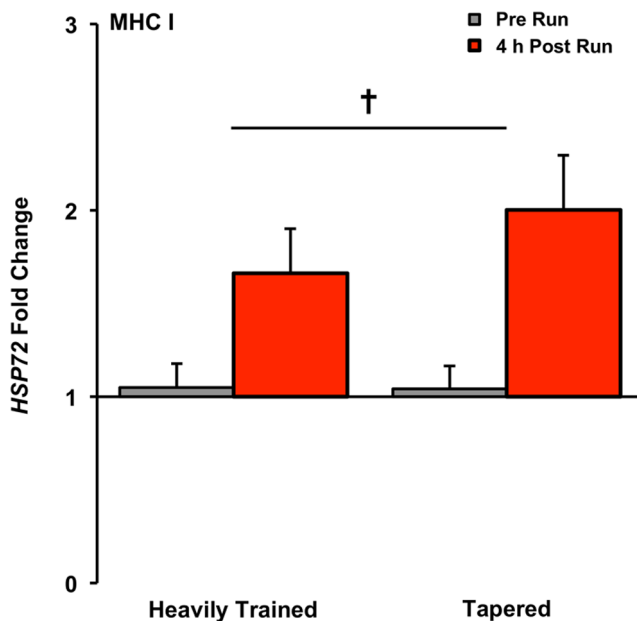

**Figure 7.** *HSP72* gene expression response after an 8 km run in the heavily trained (T1:T2) and tapered (T3:T4) state in MHC I fibers, presented as fold change, Main time effect for exercise,  $P < 0.05$ .  
doi:10.1371/journal.pone.0108547.g007

## Author Contributions

Conceived and designed the experiments: ST K. Murach NL UR. Performed the experiments: K. Murach UR BW K. Minchev BJ JB.

## References

- Trappe S, Costill D, Thomas R (2000) Effect of swim taper on whole muscle and single muscle fiber contractile properties. *Med Sci Sports Exerc* 32: 48–56.
- Luden N, Hayes E, Galpin A, Minchev K, Jemiolo B, et al. (2010) Myocellular basis for tapering in competitive distance runners. *J Appl Physiol* 108: 1501–1509.
- Neary JP, Martin TP, Quinney HA (2003) Effects of taper on endurance cycling capacity and single muscle fiber properties. *Med Sci Sports Exerc* 35: 1875–1881.
- Costill D, King D, Thomas R, Hagreaves M (1985) Effects of Reduced Training on Muscular Power in Swimmers. *The Physician and Sports Medicine* 13: 94–101.
- Jemiolo B, Trappe S (2004) Single muscle fiber gene expression in human skeletal muscle: validation of internal control with exercise. *Biochem Biophys Res Commun* 320: 1043–1050.
- Raue U, Trappe TA, Estrem ST, Qian HR, Helvering LM, et al. (2012) Transcriptome signature of resistance exercise adaptations: mixed muscle and fiber type specific profiles in young and old adults. *J Appl Physiol* 112: 1625–1636.
- Yang Y, Creer A, Jemiolo B, Trappe S (2005) Time course of myogenic and metabolic gene expression in response to acute exercise in human skeletal muscle. *J Appl Physiol* 98: 1745–1752.
- Schmutz S, Dapp C, Wittwer M, Vogt M, Hoppeler H, et al. (2006) Endurance training modulates the muscular transcriptome response to acute exercise. *Pflügers Arch* 451: 678–687.
- Raue U, Slivka D, Minchev K, Trappe S (2009) Improvements in whole muscle and myocellular function are limited with high-intensity resistance training in octogenarian women. *J Appl Physiol* 106: 1611–1617.
- Harridge SD (2007) Plasticity of human skeletal muscle: gene expression to in vivo function. *Exp Physiol* 92: 783–797.
- Yang Y, Jemiolo B, Trappe S (2006) Proteolytic mRNA expression in response to acute resistance exercise in human single skeletal muscle fibers. *J Appl Physiol* 101: 1442–1450.
- Yamada P, Amorim F, Moseley P, Schneider S (2008) Heat shock protein 72 response to exercise in humans. *Sports Med* 38: 715–733.
- Costill DL, Sparks K, Gregor R, Turner C (1971) Muscle glycogen utilization during exhaustive running. *J Appl Physiol* 31: 353–356.
- Louis E, Raue U, Yang Y, Jemiolo B, Trappe S (2007) Time course of proteolytic, cytokine, and myostatin gene expression after acute exercise in human skeletal muscle. *J Appl Physiol* 103: 1744–1751.
- Dickinson JM, Lec JD, Sullivan BE, Harber MP, Trappe SW, et al. (2010) A new method to study in vivo protein synthesis in slow- and fast-twitch muscle fibers and initial measurements in humans. *J Appl Physiol* 108: 1410–1416.
- Galpin AJ, Raue U, Jemiolo B, Trappe TA, Harber MP, et al. (2012) Human skeletal muscle fiber type specific protein content. *Anal Biochem* 425: 175–182.
- Trappe TA, Carroll CC, Jemiolo B, Trappe SW, Dossing S, et al. (2008) Cyclooxygenase mRNA expression in human patellar tendon at rest and after exercise. *Am J Physiol Regul Integr Comp Physiol* 294: R192–199.
- Coffey VG, Jemiolo B, Edge J, Garnham AP, Trappe SW, et al. (2009) Effect of consecutive repeated sprint and resistance exercise bouts on acute adaptive responses in human skeletal muscle. *Am J Physiol Regul Integr Comp Physiol* 297: R1441–1451.
- Livak KJ, Schmittgen TD (2001) Analysis of relative gene expression data using real-time quantitative PCR and the 2(-Delta Delta C(T)) Method. *Methods* 25: 402–408.
- Raue U, Slivka D, Jemiolo B, Hollon C, Trappe S (2007) Proteolytic gene expression differs at rest and after resistance exercise between young and old women. *J Gerontol A Biol Sci Med Sci* 62: 1407–1412.
- Egan B, O'Connor PL, Zierath JR, O'Gorman DJ (2013) Time course analysis reveals gene-specific transcript and protein kinetics of adaptation to short-term aerobic exercise training in human skeletal muscle. *PLoS One* 8: e74098.
- Perry CG, Lally J, Holloway GP, Heigenhauser GJ, Bonen A, et al. (2010) Repeated transient mRNA bursts precede increases in transcriptional and mitochondrial proteins during training in human skeletal muscle. *J Physiol* 588: 4795–4810.
- Saltin B, Henriksson J, Nygaard E, Andersen P, Jansson E (1977) Fiber types and metabolic potentials of skeletal muscles in sedentary man and endurance runners. *Ann N Y Acad Sci* 301: 3–29.
- Woolstenhulme MT, Conlee RK, Drummond MJ, Sutes AW, Parcell AC (2006) Temporal response of desmin and dystrophin proteins to progressive resistance exercise in human skeletal muscle. *J Appl Physiol* (1985) 100: 1876–1882.
- Hakkinen K, Alen M, Komi PV (1985) Changes in isometric force- and relaxation-time, electromyographic and muscle fibre characteristics of human skeletal muscle during strength training and detraining. *Acta Physiol Scand* 125: 573–585.
- Fitts RH, Costill DL, Gardetto PR (1989) Effect of swim exercise training on human muscle fiber function. *J Appl Physiol* 66: 465–475.
- Kohn TA, Essen-Gustavsson B, Myburgh KH (2011) Specific muscle adaptations in type II fibers after high-intensity interval training of well-trained runners. *Scand J Med Sci Sports* 21: 765–772.
- Winkles JA (2008) The TWEAK-Fn14 cytokine-receptor axis: discovery, biology and therapeutic targeting. *Nat Rev Drug Discov* 7: 411–425.
- Burkly LC, Michaelson JS, Zheng TS (2011) TWEAK/Fn14 pathway: an immunological switch for shaping tissue responses. *Immunol Rev* 244: 99–114.
- Mittal A, Bhatnagar S, Kumar A, Lach-Trifilieff E, Wauters S, et al. (2010) The TWEAK-Fn14 system is a critical regulator of denervation-induced skeletal muscle atrophy in mice. *J Cell Biol* 188: 833–849.
- Dogra C, Hall SL, Wedhas N, Linkhart TA, Kumar A (2007) Fibroblast growth factor inducible 14 (Fn14) is required for the expression of myogenic regulatory factors and differentiation of myoblasts into myotubes. Evidence for TWEAK-independent functions of Fn14 during myogenesis. *J Biol Chem* 282: 15000–15010.
- Girgenrath M, Weng S, Kostek CA, Browning B, Wang M, et al. (2006) TWEAK, via its receptor Fn14, is a novel regulator of mesenchymal progenitor cells and skeletal muscle regeneration. *EMBO J* 25: 5826–5839.
- Costa A, Dalloul H, Hegyesi H, Apor P, Csende Z, et al. (2007) Impact of repeated bouts of eccentric exercise on myogenic gene expression. *Eur J Appl Physiol* 101: 427–436.
- Kim JS, Petrella JK, Cross JM, Bamman MM (2007) Load-mediated downregulation of myostatin mRNA is not sufficient to promote myofiber hypertrophy in humans: a cluster analysis. *J Appl Physiol* 103: 1488–1495.
- Raue U, Slivka D, Jemiolo B, Hollon C, Trappe S (2006) Myogenic gene expression at rest and after a bout of resistance exercise in young (18–30 yr) and old (80–89 yr) women. *J Appl Physiol* 101: 53–59.
- Roth SM, Martel GF, Ferrell RE, Metter EJ, Hurley BF, et al. (2003) Myostatin gene expression is reduced in humans with heavy-resistance strength training: a brief communication. *Exp Biol Med* (Maywood) 228: 706–709.
- Harber MP, Crane JD, Dickinson JM, Jemiolo B, Raue U, et al. (2009) Protein synthesis and the expression of growth-related genes are altered by running in human vastus lateralis and soleus muscles. *Am J Physiol Regul Integr Comp Physiol* 296: R708–714.
- Hittel DS, Axelson M, Sarna N, Shearer J, Huffman KM, et al. (2010) Myostatin decreases with aerobic exercise and associates with insulin resistance. *Med Sci Sports Exerc* 42: 2023–2029.
- Chen Y, Ye J, Cao L, Zhang Y, Xia W, et al. (2010) Myostatin regulates glucose metabolism via the AMP-activated protein kinase pathway in skeletal muscle cells. *Int J Biochem Cell Biol* 42: 2072–2081.
- Matsakas A, Friedel A, Hertrampf T, Diel P (2005) Short-term endurance training results in a muscle-specific decrease of myostatin mRNA content in the rat. *Acta Physiol Scand* 183: 299–307.
- Welle S, Burgess K, Thornton CA, Tawil R (2009) Relation between extent of myostatin depletion and muscle growth in mature mice. *Am J Physiol Endocrinol Metab* 297: E935–940.
- Arounleut P, Bialek P, Liang LF, Upadhyay S, Fulzele S, et al. (2013) A myostatin inhibitor (propeptide-Fc) increases muscle mass and muscle fiber size in aged mice but does not increase bone density or bone strength. *Exp Gerontol* 48: 898–904.
- Carlson CJ, Booth FW, Gordon SE (1999) Skeletal muscle myostatin mRNA expression is fiber-type specific and increases during hindlimb unloading. *Am J Physiol* 277: R601–606.
- Liu CM, Yang Z, Liu CW, Wang R, Tien P, et al. (2008) Myostatin antisense RNA-mediated muscle growth in normal and cancer cachexia mice. *Gene Ther* 15: 155–160.
- Magge TR, Artaza JN, Ferrini MG, Vernet D, Zuniga FI, et al. (2006) Myostatin short interfering hairpin RNA gene transfer increases skeletal muscle mass. *J Gene Med* 8: 1171–1181.
- Wehling M, Cai B, Tidball JG (2000) Modulation of myostatin expression during modified muscle use. *FASEB J* 14: 103–110.
- Jespersen JG, Nedergaard A, Andersen LL, Schjerling P, Andersen JL (2011) Myostatin expression during human muscle hypertrophy and subsequent atrophy: increased myostatin with detraining. *Scand J Med Sci Sports* 21: 215–223.
- Reardon KA, Davis J, Kapsa RM, Choong P, Byrne E (2001) Myostatin, insulin-like growth factor-1, and leukemia inhibitory factor mRNAs are upregulated in chronic human disuse muscle atrophy. *Muscle Nerve* 24: 893–899.
- Wojcik S, Nogalska A, Engel WK, Askanas V (2008) Myostatin and its precursor protein are increased in the skeletal muscle of patients with Type-II muscle fibre atrophy. *Folia Morphol (Warsz)* 67: 6–12.
- Nedergaard A, Vissing K, Overgaard K, Kjaer M, Schjerling P (2007) Expression patterns of atrogenic and ubiquitin proteasome component genes with exercise: effect of different loading patterns and repeated exercise bouts. *J Appl Physiol* (1985) 103: 1513–1522.



51. Harber MP, Konopka AR, Jemiolo B, Trappe SW, Trappe TA, et al. (2010) Muscle protein synthesis and gene expression during recovery from aerobic exercise in the fasted and fed states. *Am J Physiol Regul Integr Comp Physiol* 299: R1254–1262.
52. Leger B, Cartoni R, Praz M, Lamon S, Deriaz O, et al. (2006) Akt signalling through GSK-3beta, mTOR and Foxo1 is involved in human skeletal muscle hypertrophy and atrophy. *J Physiol* 576: 923–933.
53. Hernando R, Manso R (1997) Muscle fibre stress in response to exercise: synthesis, accumulation and isoform transitions of 70-kDa heat-shock proteins. *Eur J Biochem* 243: 460–467.
54. Larkins NT, Murphy RM, Lamb GD (2012) Absolute amounts and diffusibility of HSP72, HSP25, and alphaB-crystallin in fast- and slow-twitch skeletal muscle fibers of rat. *Am J Physiol Cell Physiol* 302: C228–239.
55. Locke M, Noble EG, Atkinson BG (1991) Inducible isoform of HSP70 is constitutively expressed in a muscle fiber type specific pattern. *Am J Physiol* 261: C774–779.
56. Tupling AR, Bombardier E, Stewart RD, Vigna C, Aquil AE (2007) Muscle fiber type-specific response of Hsp70 expression in human quadriceps following acute isometric exercise. *J Appl Physiol* (1985) 103: 2105–2111.
57. Cornelison DD, Wold BJ (1997) Single-cell analysis of regulatory gene expression in quiescent and activated mouse skeletal muscle satellite cells. *Dev Biol* 191: 270–283.
58. Yablonka-Reuveni Z, Rivera AJ (1994) Temporal expression of regulatory and structural muscle proteins during myogenesis of satellite cells on isolated adult rat fibers. *Dev Biol* 164: 588–603.
59. Hameed M, Orrell RW, Cobbold M, Goldspink G, Harridge SD (2003) Expression of IGF-I splice variants in young and old human skeletal muscle after high resistance exercise. *J Physiol* 547: 247–254.
60. Psilander N, Damsgaard R, Pilegaard H (2003) Resistance exercise alters MRF and IGF-I mRNA content in human skeletal muscle. *J Appl Physiol* 95: 1038–1044.
61. Liu Y, Mayr S, Opitz-Gress A, Zeller C, Lormes W, et al. (1999) Human skeletal muscle HSP70 response to training in highly trained rowers. *J Appl Physiol* 86: 101–104.
