# Supplementary material for: Single Muscle Fiber Gene Expression with Run Taper
Source: PLOS journal article supplement (doi:10.1371/journal.pone.0108547), 2014-09-30
Supplement: S1 (10.1371/journal.pone.0108547.s001) [file journal.pone.0108547.s001]

**Table S1.** Summary of literature on selective fast-twitch size alterations in young healthy individuals.

| Reference                         | Subject Population        | Training Stimulus                     | Sex (n)         | Age (y)    | MHC Ila CSA (%Δ)      | Duration            | Rate (%Δ/week) | Muscle | Method |
|-----------------------------------|---------------------------|---------------------------------------|-----------------|------------|-----------------------|---------------------|----------------|--------|--------|
| <b><u>Resistance Training</u></b> |                           |                                       |                 |            |                       |                     |                |        |        |
| Hakkinen 1981 (17)                | Recreational              | Con/Ecc                               | M (14)          | 20-30      | ↑ 13.5% <sup>a</sup>  | 8 wks <sup>b</sup>  | ↑ 1.7%         | VL     | H      |
| Houston 1983 (25)                 | Recreational              | Con/Ecc                               | M (6)           | 20±1       | ↑ 21.0%               | 10 wks              | ↑ 2.1%         | VL     | H      |
| Hakkinen 1985 (16)                | Recreational              | Con/Ecc                               | M (11)          | 20-32      | ↑ 28.8% <sup>a</sup>  | 24 wks              | ↑ 1.2%         | VL     | H      |
| Tesch 1987 (38)                   | Recreational              | Con/Ecc/Ecc and Explosive             | M (11, 10)      | 26±4, 27±3 | ↑ 28.9%, 12.8%        | 24 wks              | ↑ 1.2%, 0.5%   | VL     | H      |
| Alway 1989 (2)                    | Untrained                 | Isometric                             | M (7)           | 25±3       | ↑ 50.0%               | 16 wks              | ↑ 3.1%         | LG     | H      |
| Alway 1990 (3)                    | Untrained                 | Isometric                             | M (6)           | 27±3       | ↑ 30.0%               | 16 wks              | ↑ 1.9%         | LG     | H      |
| Staron 1991 (37)                  | Untrained                 | High-Intensity Retraining             | F (7)           | 21±1       | ↑ 18.0%               | 6 wks               | ↑ 3.0%         | VL     | H      |
| Hather 1991 (20)                  | Recreational              | High-Volume Concentric                | M (10)          | 33±1       | ↑ 27.0%               | 19 wks              | ↑ 1.4%         | VL     | H      |
| Hickson 1994 (21)                 | Recreational              | Con/Ecc                               | M (5) + F (5)   | 29±1       | ↑ 19.0%               | 16 wks              | ↑ 1.2%         | VL     | H      |
| Hortobagyi 1996 (22)              | Untrained                 | Eccentric Overload                    | M (7)           | 20±1       | ↑ 37.8%               | 12 wks              | ↑ 3.2%         | VL     | H      |
| Volek 1999 (40)                   | Trained                   | Con/Ecc                               | M (9)           | 25±6       | ↑ 5.9%                | 12 wks              | ↑ 0.5%         | VL     | H      |
| Andersen 2000 (4)                 | Untrained                 | Con/Ecc                               | M (9)           | 27±3       | ↑ 18.6%               | 12 wks              | ↑ 1.6%         | VL     | H      |
| Aagaard 2001 (1)                  | Untrained                 | Con/Ecc                               | M (11)          | 27±5       | ↑ 18.4                | 12 wks              | ↑ 1.5%         | VL     | H      |
| Harber 2004 (18)                  | Untrained                 | Circuit Training                      | M (8)           | 24±2       | ↑ 21.2%               | 10 wks              | ↑ 2.1%         | VL     | H      |
| Cribb 2006 (11)                   | Recreational Bodybuilders | Con/Ecc with PRO/CP                   | M (8)           | 21±3       | ↑ 25.0%               | 10 wks              | ↑ 2.5%         | VL     | H      |
| Woolstenhulme 2006 (41)           | Untrained                 | Con/Ecc                               | M (6)           | 21±4       | ↑ 15.1%               | 4 wks (8 wks total) | ↑ 3.8%         | VL     | H      |
| Cribb 2007 (12)                   | Recreational Bodybuilders | Con/Ecc with CHO                      | M (7)           | 24±7       | ↑ 4.8%                | 10 wks              | ↑ 0.5%         | VL     | H      |
| Hartman 2007 (19)                 | Untrained                 | Con/Ecc with CHO                      | M (19)          | 18-30      | ↑ 11.8%               | 12 wks              | ↑ 1.0%         | VL     | H      |
| Raue 2009 (34)                    | Untrained                 | Con/Ecc                               | F (9)           | 21±2       | ↑ 28.0%               | 12 wks              | ↑ 2.3%         | VL     | SFD    |
| Clafin 2011 (10)                  | Untrained                 | Con/Ecc and High Velocity             | M (15) + F (18) | 25±--      | ↑ 8.3%                | 14 wks              | ↑ 0.6%         | VL     | SFD    |
| Farup 2012 (13)                   | Untrained                 | Con/Ecc                               | M (18)          | 23±1       | ↑ 22.0%               | 10 wks              | ↑ 2.2%         | VL     | H      |
| Schuenke 2012 (36)                | Untrained                 | Low Velocity Con/Ecc                  | F (10)          | 19±1       | ↑ 13.0%               | 6 wks               | ↑ 2.2%         | VL     | H      |
| <b><u>Aerobic Training</u></b>    |                           |                                       |                 |            |                       |                     |                |        |        |
| Andersen 1977 (5)                 | Untrained                 | Cycling                               | M (5)           | 20-23      | ↑ 16.8%               | 8 wks               | ↑ 2.1%         | VL     | H      |
| Houston 1979 (24)                 | Trained                   | Run Training After Detraining         | M (3)           | 33±3       | ↑ 32.4% <sup>cd</sup> | 15 d                | ↑ 15.1%        | LG     | H      |
| Bangsbo 1988 (6)                  | Semi-Pro Soccer Players   | General Conditioning After Detraining | M (4)           | 23±--      | ↑ 16.3% <sup>d</sup>  | 4 wks               | ↑ 4.1%         | LG     | H      |
| Mizuno 1990 (31)                  | Trained                   | X-Country Skiing at Altitude          | M (10)          | 22±--      | ↑ 4.3%                | 2 wks               | ↑ 2.2%         | TB     | H      |

**Table S1 (continued).** Summary of literature on selective fast-twitch size alterations in young healthy individuals.

| Reference                          | Subject Population           | Training Stimulus    | Sex (n)         | Age (y) | MHC IIa CSA (%Δ)     | Duration | Rate (%Δ/week) | Muscle  | Method |
|------------------------------------|------------------------------|----------------------|-----------------|---------|----------------------|----------|----------------|---------|--------|
| <b><u>Combined Training</u></b>    |                              |                      |                 |         |                      |          |                |         |        |
| Kraemer 1995 (27)                  | Recreational                 | Con/Ecc + Running    | M (9)           | 23±4    | ↑ 20.1%              | 12 wks   | ↑ 1.7%         | VL      | H      |
| Bell 2000 (7)                      | Recreational                 | Con/Ecc + Cycling    | M (8) + F (5)   | 22±3    | ↑ 13.8%              | 12 wks   | ↑ 1.2%         | VL      | H      |
| Chilibeck 2002 (9)                 | Untrained                    | Con/Ecc + Cycling    | M (5) + F (5)   | 24±3    | ↑ 17.6% <sup>a</sup> | 12 wks   | ↑ 1.5%         | VL      | H      |
| McCarthy 2002 (30)                 | Untrained                    | Con/Ecc + Cycling    | M (10)          | 27±2    | ↑ 27.8%              | 10 wks   | ↑ 2.8%         | VL      | H      |
| Putman 2004 (33)                   | ---                          | Con/Ecc + Cycling    | [M + F] (10)    | 22±--   | ↑ 18.0%              | 12 wks   | ↑ 1.5%         | VL      | H      |
| Lundberg 2013 (29)                 | Recreational                 | Con/Ecc + Cycling    | M (10)          | 25±4    | ↑ 18.8%              | 5 wks    | ↑ 3.4%         | VL      | H      |
| <b><u>Intensified Training</u></b> |                              |                      |                 |         |                      |          |                |         |        |
| Fitts 1989 (14)                    | Trained                      | Swimming             | M (12)          | 19±--   | ↓ 32.6%              | 10 d     | ↓ 22.8%        | Deltoid | SFD    |
| Kohn 2011 (26)                     | Trained                      | Running              | M (18)          | ---     | ↓ 17.0% <sup>e</sup> | 6 wks    | ↓ 2.8%         | VL      | H      |
| <b><u>Taper</u></b>                |                              |                      |                 |         |                      |          |                |         |        |
| Trappe 2000 (39)                   | Trained                      | Swimming             | M (6)           | 20±1    | ↑ 24.0%              | 3 wks    | ↑ 8.0%         | Deltoid | SFD    |
| Neary 2003 (32)                    | Trained                      | Cycling              | M (22)          | 25±6    | ↑ 14.2%              | 7 d      | ↑ 14.2%        | VL      | H      |
| Luden 2010 (28)                    | Trained                      | Running              | M (7)           | 20±1    | ↑ 15.0%              | 3 wks    | ↑ 5.0%         | LG      | SFD    |
| <b><u>Detraining</u></b>           |                              |                      |                 |         |                      |          |                |         |        |
| Houston 1979 (24)                  | Trained                      | Running              | M (3)           | 33±3    | ↑ 24.3% <sup>c</sup> | 15 d     | ↑ 11.3%        | LG      | H      |
| Schantz 1983 (35)                  | Recreational                 | Weighted Skiing      | M (6)           | 25±--   | ↓ 20.0%              | 27 wks   | ↓ 0.7%         | TB      | H      |
| Bangsbo 1988 (6)                   | Semi-Pro Soccer Players      | General Conditioning | M (4)           | 23±--   | ↓ 14.1%              | 3 wks    | ↓ 4.7%         | LG      | H      |
| Hortobagyi 1993 (23)               | Football Players             | Power Activity       | M (12)          | 24±1    | ↓ 6.4%               | 2 wks    | ↓ 3.2%         | VL      | H      |
| Billeter 2003 (8)                  | Olympic Champion Shot Putter | Power Activity       | M (1)           | 32      | ↓ 24.5% <sup>c</sup> | 3 yrs    | ---            | VL      | H      |
| Gjovaag 2008 (15)                  | Untrained                    | Con/Ecc              | M (12) + F (20) | 22±1    | ↓ 10.1% <sup>f</sup> | 8 wks    | ↓ 1.3%         | TB      | H      |

<sup>a</sup>=Estimated from figure, <sup>b</sup>=of a 16 wk study, <sup>c</sup>=Non-statistical due to low *n* but larger than slow-twitch Δ, <sup>d</sup>=Compared to trained baseline, <sup>e</sup>=P=0.06, <sup>f</sup>=Compared to post-training, CON/ECC=Concentric and Eccentric Resistance Training, VL=Vastus Lateralis, LG=Lateral Gastrocnemius, TB=Triceps Brachii, H=Histochemistry, SFD=Single Fiber Diameter, PRO/CP=Protein/Creatine Supplementation, CHO=Carbohydrate Supplementation

## References

1. Aagaard P, Andersen JL, Dyhre-Poulsen P, Leffers AM, Wagner A, et al. (2001) A mechanism for increased contractile strength of human pennate muscle in response to strength training: changes in muscle architecture. *J Physiol* 534: 613-623.
2. Alway SE, MacDougall JD, Sale DG (1989) Contractile adaptations in the human triceps surae after isometric exercise. *J Appl Physiol* 66: 2725-2732.
3. Alway SE, Sale DG, MacDougall JD (1990) Twitch contractile adaptations are not dependent on the intensity of isometric exercise in the human triceps surae. *Eur J Appl Physiol Occup Physiol* 60: 346-352.
4. Andersen JL, Aagaard P (2000) Myosin heavy chain IIX overshoot in human skeletal muscle. *Muscle Nerve* 23: 1095-1104.
5. Andersen P, Henriksson J (1977) Capillary supply of the quadriceps femoris muscle of man: adaptive response to exercise. *J Physiol* 270: 677-690.
6. Bangsbo J, Mizuno M (1988) Morphological and metabolic alterations in soccer players with detraining and retraining and their relation to performance. *Science and Football*: 114-124.
7. Bell GJ, Syrotuik D, Martin TP, Burnham R, Quinney HA (2000) Effect of concurrent strength and endurance training on skeletal muscle properties and hormone concentrations in humans. *Eur J Appl Physiol* 81: 418-427.
8. Billeter R, Jostarndt-Fogen K, Gunthor W, Hoppeler H (2003) Fiber type characteristics and myosin light chain expression in a world champion shot putter. *Int J Sports Med* 24: 203-207.
9. Chilibeck PD, Syrotuik DG, Bell GJ (2002) The effect of concurrent endurance and strength training on quantitative estimates of subsarcolemmal and intermyofibrillar mitochondria. *Int J Sports Med* 23: 33-39.
10. Claflin DR, Larkin LM, Cederna PS, Horowitz JF, Alexander NB, et al. (2011) Effects of high- and low-velocity resistance training on the contractile properties of skeletal muscle fibers from young and older humans. *J Appl Physiol* 111: 1021-1030.
11. Cribb PJ, Hayes A (2006) Effects of supplement timing and resistance exercise on skeletal muscle hypertrophy. *Med Sci Sports Exerc* 38: 1918-1925.
12. Cribb PJ, Williams AD, Stathis CG, Carey MF, Hayes A (2007) Effects of whey isolate, creatine, and resistance training on muscle hypertrophy. *Med Sci Sports Exerc* 39: 298-307.
13. Farup J, Kjolhede T, Sorensen H, Dalgas U, Moller AB, et al. (2012) Muscle morphological and strength adaptations to endurance vs. resistance training. *J Strength Cond Res* 26: 398-407.
14. Fitts RH, Costill DL, Gardetto PR (1989) Effect of swim exercise training on human muscle fiber function. *J Appl Physiol* 66: 465-475.
15. Gjovaag TF, Dahl HA (2008) Effect of training with different intensities and volumes on muscle fibre enzyme activity and cross sectional area in the m. triceps brachii. *Eur J Appl Physiol* 103: 399-409.

16. Hakkinen K, Alen M, Komi PV (1985) Changes in isometric force- and relaxation-time, electromyographic and muscle fibre characteristics of human skeletal muscle during strength training and detraining. *Acta Physiol Scand* 125: 573-585.
17. Hakkinen K, Komi P, Tesch P (1981) Effect of combined concentric and eccentric strength training and detraining on force-time, muscle fiber and metabolic characteristics of leg extensor muscles. *Scand J Sports Sci* 3: 50-58.
18. Harber MP, Fry AC, Rubin MR, Smith JC, Weiss LW (2004) Skeletal muscle and hormonal adaptations to circuit weight training in untrained men. *Scand J Med Sci Sports* 14: 176-185.
19. Hartman JW, Tang JE, Wilkinson SB, Tarnopolsky MA, Lawrence RL, et al. (2007) Consumption of fat-free fluid milk after resistance exercise promotes greater lean mass accretion than does consumption of soy or carbohydrate in young, novice, male weightlifters. *Am J Clin Nutr* 86: 373-381.
20. Hather BM, Tesch PA, Buchanan P, Dudley GA (1991) Influence of eccentric actions on skeletal muscle adaptations to resistance training. *Acta Physiol Scand* 143: 177-185.
21. Hickson RC, Hidaka K, Foster C, Falduto MT, Chatterton RT, Jr. (1994) Successive time courses of strength development and steroid hormone responses to heavy-resistance training. *J Appl Physiol* 76: 663-670.
22. Hortobagyi T, Hill JP, Houmard JA, Fraser DD, Lambert NJ, et al. (1996) Adaptive responses to muscle lengthening and shortening in humans. *J Appl Physiol* 80: 765-772.
23. Hortobagyi T, Houmard JA, Stevenson JR, Fraser DD, Johns RA, et al. (1993) The effects of detraining on power athletes. *Med Sci Sports Exerc* 25: 929-935.
24. Houston ME, Bentzen H, Larsen H (1979) Interrelationships between skeletal muscle adaptations and performance as studied by detraining and retraining. *Acta Physiol Scand* 105: 163-170.
25. Houston ME, Froese EA, Valeriote SP, Green HJ, Ranney DA (1983) Muscle performance, morphology and metabolic capacity during strength training and detraining: a one leg model. *Eur J Appl Physiol Occup Physiol* 51: 25-35.
26. Kohn TA, Essen-Gustavsson B, Myburgh KH (2011) Specific muscle adaptations in type II fibers after high-intensity interval training of well-trained runners. *Scand J Med Sci Sports* 21: 765-772.
27. Kraemer WJ, Patton JF, Gordon SE, Harman EA, Deschenes MR, et al. (1995) Compatibility of high-intensity strength and endurance training on hormonal and skeletal muscle adaptations. *J Appl Physiol* 78: 976-989.
28. Luden N, Hayes E, Galpin A, Minchev K, Jemiole B, et al. (2010) Myocellular basis for tapering in competitive distance runners. *J Appl Physiol* 108: 1501-1509.

29. Lundberg TR, Fernandez-Gonzalo R, Gustafsson T, Tesch PA (2013) Aerobic exercise does not compromise muscle hypertrophy response to short-term resistance training. *J Appl Physiol* 114: 81-89.
30. McCarthy JP, Pozniak MA, Agre JC (2002) Neuromuscular adaptations to concurrent strength and endurance training. *Med Sci Sports Exerc* 34: 511-519.
31. Mizuno M, Juel C, Bro-Rasmussen T, Mygind E, Schibye B, et al. (1990) Limb skeletal muscle adaptation in athletes after training at altitude. *J Appl Physiol* 68: 496-502.
32. Neary JP, Martin TP, Quinney HA (2003) Effects of taper on endurance cycling capacity and single muscle fiber properties. *Med Sci Sports Exerc* 35: 1875-1881.
33. Putman CT, Xu X, Gillies E, MacLean IM, Bell GJ (2004) Effects of strength, endurance and combined training on myosin heavy chain content and fibre-type distribution in humans. *Eur J Appl Physiol* 92: 376-384.
34. Raue U, Slivka D, Minchev K, Trappe S (2009) Improvements in whole muscle and myocellular function are limited with high-intensity resistance training in octogenarian women. *J Appl Physiol* 106: 1611-1617.
35. Schantz P, Henriksson J, Jansson E (1983) Adaptation of human skeletal muscle to endurance training of long duration. *Clin Physiol* 3: 141-151.
36. Schuenke MD, Herman JR, Gliders RM, Hagerman FC, Hikida RS, et al. (2012) Early-phase muscular adaptations in response to slow-speed versus traditional resistance-training regimens. *Eur J Appl Physiol* 112: 3585-3595.
37. Staron RS, Leonardi MJ, Karapondo DL, Malicky ES, Falkel JE, et al. (1991) Strength and skeletal muscle adaptations in heavy-resistance-trained women after detraining and retraining. *J Appl Physiol* 70: 631-640.
38. Tesch PA, Komi PV, Hakkinen K (1987) Enzymatic adaptations consequent to long-term strength training. *Int J Sports Med* 8 Suppl 1: 66-69.
39. Trappe S, Costill D, Thomas R (2000) Effect of swim taper on whole muscle and single muscle fiber contractile properties. *Med Sci Sports Exerc* 32: 48-56.
40. Volek JS, Duncan ND, Mazzetti SA, Staron RS, Putukian M, et al. (1999) Performance and muscle fiber adaptations to creatine supplementation and heavy resistance training. *Med Sci Sports Exerc* 31: 1147-1156.
41. Woolstenhulme MT, Conlee RK, Drummond MJ, Stites AW, Parcell AC (2006) Temporal response of desmin and dystrophin proteins to progressive resistance exercise in human skeletal muscle. *J Appl Physiol* 100: 1876-1882.
